# Supplementary material for: Role of Klotho as a Modulator of Oxidative Stress Associated with Ovarian Tissue Cryopreservation
Source: MDPI journal article supplement (doi:10.3390/ijms222413547), 2021-12-17
Supplement: s1 [file s1]

# Supplementary Figure S1.

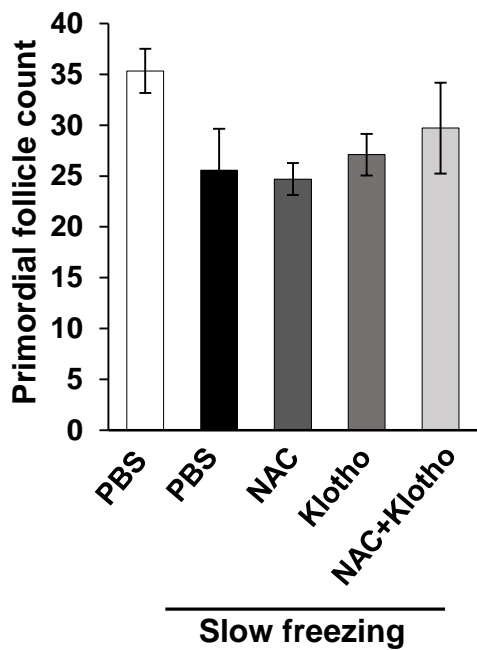

**Supplementary Figure S1. Slow-freezing cryopreservation reveals changes in primordial follicle number.** Primordial follicle density in frozen–thawed ovarian tissues. There was no significant differences in follicle density between each group.

Supplementary Figure S2.

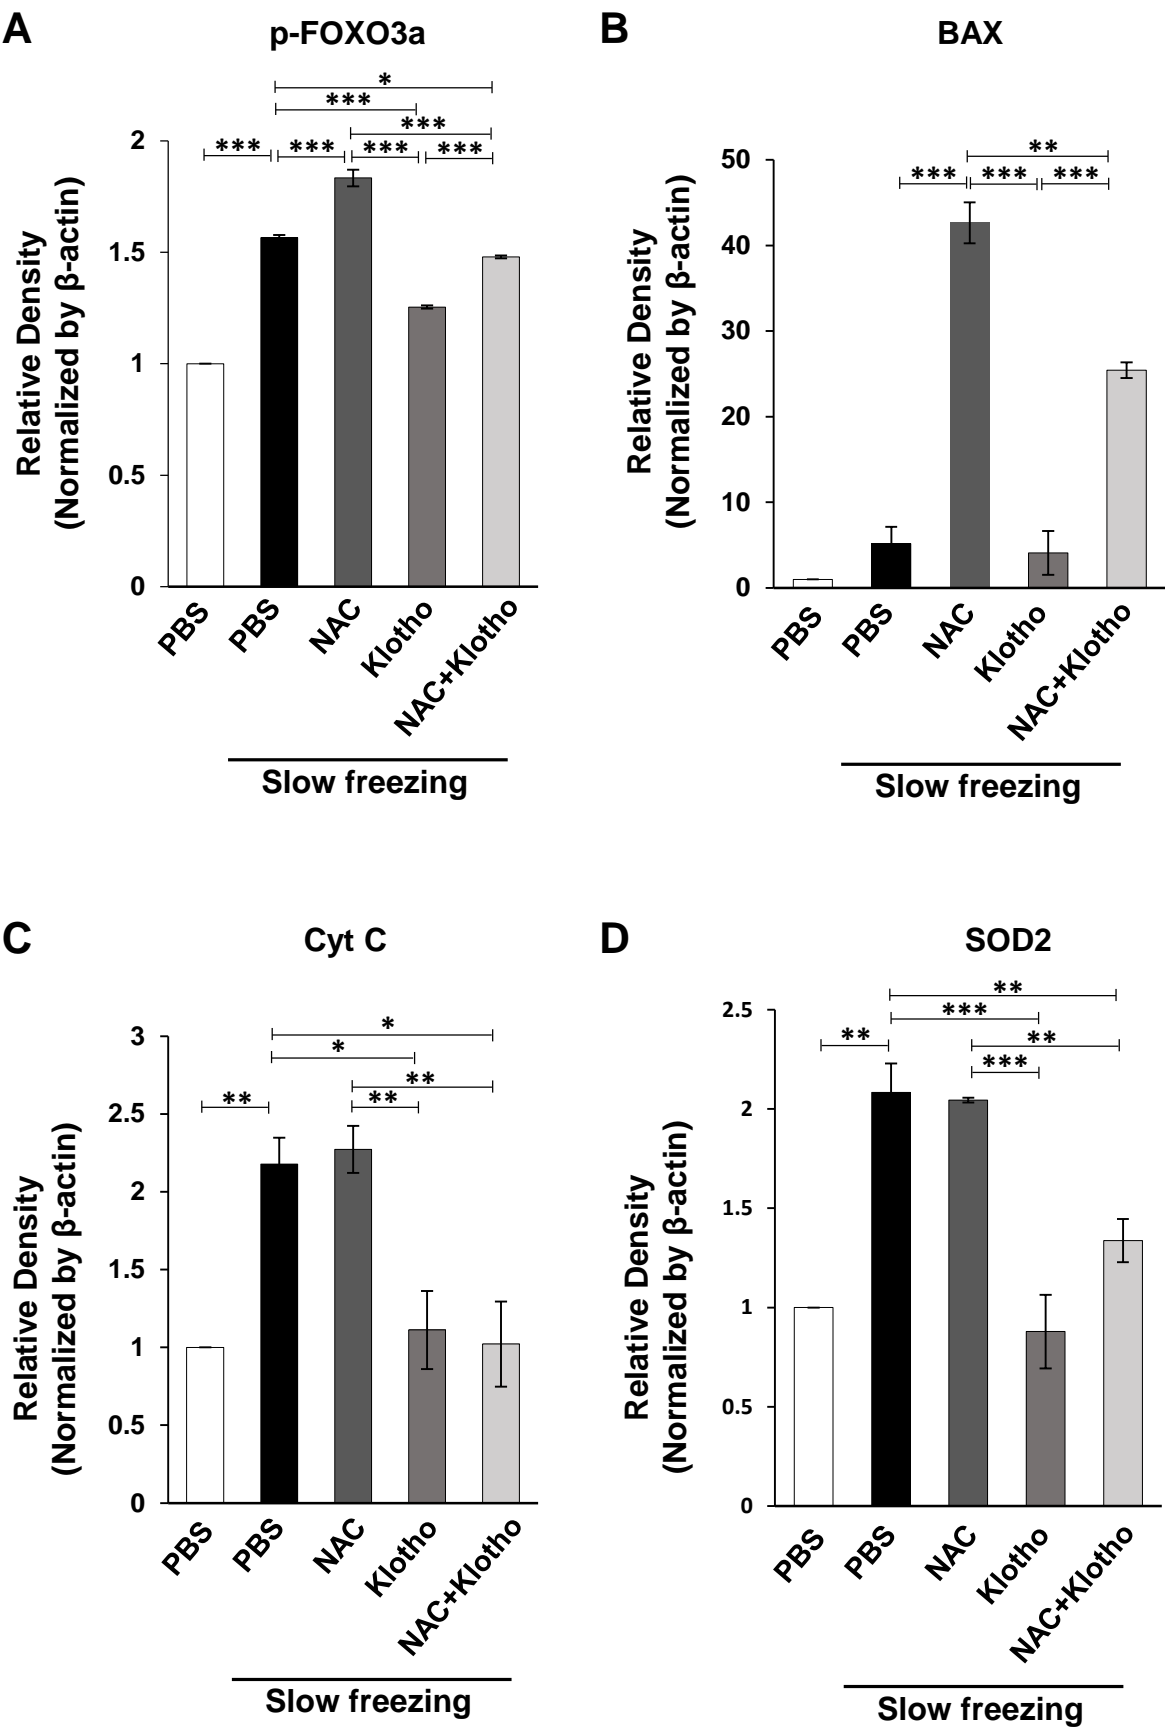

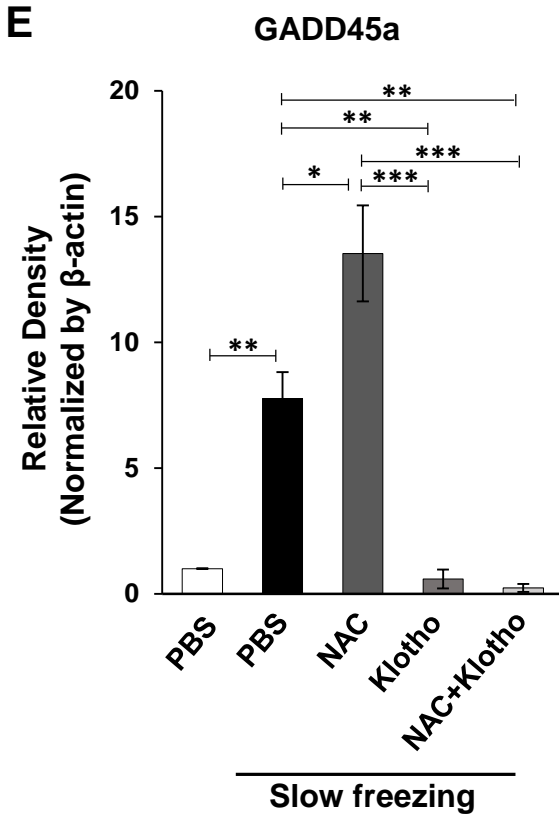

**Supplementary Figure S2. Klotho reduced NAC-induced apoptosis.** (A-E) Immunoblotting quantification by densitometry analyzed by ImageJ in Figure 4C. Each image was normalized by  $\beta$ -actin loading control. All data are shown as mean  $\pm$  SD. The p values were determined by one-way ANOVA. \*,  $p < 0.05$ ; \*\*,  $p < 0.01$ ; \*\*\*,  $p < 0.001$ .
